# Supplementary material
Source: Springer Nature journal article supplement (https://www.springermedizin.de/resource/supplementary/13058_2013_3556_MOESM6_ESM.pdf/9703948)

**a)**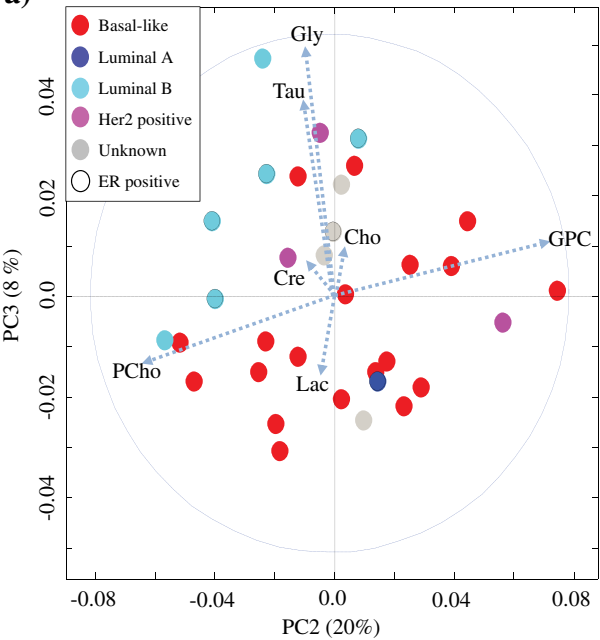**b)**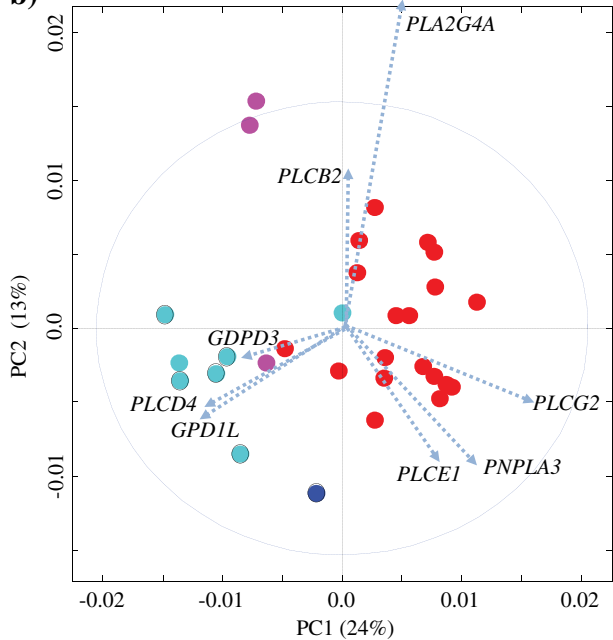

Supplement: MOESM6 [file 9703948]
